# Supplementary material for: Everyday Life Meaningfulness for the Community-Dwelling Oldest Old During the COVID-19 Pandemic
Source: PubMed Central journal article supplement (PMC8459014; doi:10.3389/fpsyg.2021.716428), 2021-09-09
Supplement: Table_1.pdf [file Table_1.pdf]

**Supplementary Table 1.** Associations between three meaningfulness items and sociodemographic factors, health-related factors and physical isolation status among community-dwelling oldest old in Finland during the Covid-19 pandemic.

|                      |                   | I feel that what I do every day is significant |           |           |                 | I belong to a group or community that is important for me |           |           |                 | I feel that my life has purpose |           |           |                 |
|----------------------|-------------------|------------------------------------------------|-----------|-----------|-----------------|-----------------------------------------------------------|-----------|-----------|-----------------|---------------------------------|-----------|-----------|-----------------|
|                      |                   | Disagree                                       | Neither   | Agree     | <i>p</i> Value* | Disagree                                                  | Neither   | Agree     | <i>p</i> Value* | Disagree                        | Neither   | Agree     | <i>p</i> Value* |
|                      |                   | % (n)                                          |           | % (n)     |                 | % (n)                                                     |           | % (n)     |                 | % (n)                           |           | % (n)     |                 |
| Gender               | Women             | 10.3 (6)                                       | 10.3 (6)  | 79.3 (46) | 0.416           | 21.1 (12)                                                 | 14.0 (8)  | 64.9 (37) | 0.075           | 11.7 (7)                        | 10.0 (6)  | 78.3 (47) | 0.080           |
|                      | Men               | 5.0 (2)                                        | 17.5 (7)  | 77.5 (31) |                 | 10.8 (4)                                                  | 32.4 (12) | 56.8 (21) |                 | 0.0                             | 12.5 (5)  | 87.5 (35) |                 |
| Age                  | <82.5 y           | 3.2 (1)                                        | 16.1 (5)  | 80.6 (25) | 0.728           | 15.6 (5)                                                  | 28.1 (9)  | 56.3 (18) | 0.719           | 6.1 (2)                         | 6.1 (2)   | 87.9 (29) | 0.779           |
|                      | 85.5–88.8 y       | 8.6 (3)                                        | 11.4 (4)  | 80.0 (28) |                 | 21.2 (7)                                                  | 15.2 (5)  | 63.6 (21) |                 | 8.6 (3)                         | 11.4 (4)  | 80.0 (28) |                 |
|                      | <88.8 y           | 12.5 (4)                                       | 12.5 (4)  | 75.0 (24) |                 | 13.8 (4)                                                  | 20.7 (6)  | 65.5 (19) |                 | 6.3 (2)                         | 15.6 (5)  | 78.1 (25) |                 |
| Lives alone          | Yes               | 10.3 (6)                                       | 13.8 (8)  | 75.9 (44) | 0.738           | 22.2 (12)                                                 | 16.7 (9)  | 61.1 (33) | 0.363           | 10.3 (7)                        | 15.5 (9)  | 74.1 (43) | 0.157           |
|                      | No                | 8.3 (2)                                        | 8.3 (2)   | 83.3 (20) |                 | 12.0 (3)                                                  | 28.0 (7)  | 60.0 (15) |                 | 3.8 (1)                         | 3.8 (1)   | 92.3 (24) |                 |
| Physical isolation   | Yes               | 10.0 (7)                                       | 15.7 (11) | 74.3 (52) | <b>0.035</b>    | 19.1 (13)                                                 | 23.5 (16) | 57.4 (39) | <b>0.035</b>    | 4.8 (1)                         | 0.0 (0)   | 95.2 (20) | 0.140           |
|                      | No                | 0.0 (0)                                        | 0.0 (0)   | 100 (21)  |                 | 5.3 (1)                                                   | 5.3 (1)   | 89.5 (17) |                 | 6.9 (5)                         | 15.3 (11) | 77.8 (56) |                 |
| Self-rated health    | Poor              | 7.7 (1)                                        | 15.4 (2)  | 76.9 (10) | 0.970           | 33.3 (4)                                                  | 33.3 (4)  | 33.3 (4)  | 0.087           | 28.6 (4)                        | 7.1 (1)   | 64.3 (9)  | <b>0.003</b>    |
|                      | Average or higher | 8.2 (7)                                        | 12.9 (11) | 78.8 (67) |                 | 14.6 (12)                                                 | 19.5 (16) | 65.9 (54) |                 | 3.5 (3)                         | 11.6 (10) | 84.9 (73) |                 |
| Physical functioning | Good              | 7.1 (4)                                        | 14.3 (8)  | 78.6 (44) | 0.314           | 12.7 (7)                                                  | 21.8 (12) | 65.5 (36) | 0.608           | 5.4 (3)                         | 8.9 (5)   | 85.7 (48) | 0.208           |
|                      | Moderate          | 4.0 (1)                                        | 20.0 (5)  | 76.0 (19) |                 | 27.3 (6)                                                  | 22.7 (5)  | 50.0 (11) |                 | 4.0 (1)                         | 20.0 (5)  | 76.0 (19) |                 |
|                      | Poor              | 22.2 (2)                                       | 0.0 (0)   | 77.8 (7)  |                 | 22.2 (2)                                                  | 22.2 (2)  | 55.6 (5)  |                 | 22.2 (2)                        | 11.1 (1)  | 66.7 (6)  |                 |
| Cognitive capacity   | Higher            | 7.4 (5)                                        | 13.2 (9)  | 79.4 (54) | 0.467           | 10.9 (7)                                                  | 21.9 (14) | 67.2 (43) | 0.338           | 4.4 (3)                         | 11.8 (8)  | 83.8 (57) | 0.219           |
|                      | Lower             | 10.1 (1)                                       | 0.0 (0)   | 90.0 (9)  |                 | 27.3 (3)                                                  | 18.2 (2)  | 54.5 (6)  |                 | 18.2 (2)                        | 9.1 (1)   | 72.7 (8)  |                 |

\*Chi-square test. Statistically significant *p* Values (<0.05) are in bold.
